# Supplementary material
Source: PubMed Central journal article supplement (PMC3580178)
Supplement: NIHMS407491-supplement-1_si_001.pdf [file NIHMS407491-supplement-1_si_001.pdf]

## Supporting Information

Table 1 2-Compartment Analysis of Sulforaphane-GSH in Rat Plasma

Table 2 2-Compartment Analysis of Sulforaphane-NAC in Rat Plasma

| Parameter                             | Unit          | Value  | %CV     |
|---------------------------------------|---------------|--------|---------|
| AUC 0-24 (Obs)                        | ng*h/mL       | 2257.3 |         |
| AUC 0-24 (Calc)                       | ng*h/mL       | 2554.3 |         |
| AUC 0-inf (Obs)                       | ng*h/mL       | 3344   |         |
| AUC 0-inf (Calc)                      | ng*h/mL       | 2677.3 |         |
| CL                                    | L/h           | 2.742  | 41.14%  |
| Vc                                    | L             | 1.601  | 73.45%  |
| CL2                                   | L/h           | 1.602  | 104.28% |
| V2                                    | L             | 11.85  | 121.62% |
| CL/Kg                                 | L/h/Kg        | 9.140  | 41.14%  |
| Vc/Kg                                 | L/Kg          | 5.338  | 73.45%  |
| CL2/Kg                                | L/h/kg        | 5.341  | 104.28% |
| V2/Kg                                 | L/kg          | 39.49  | 121.62% |
| K10                                   | 1/h           | 1.712  | 84.19%  |
| K12                                   | 1/h           | 1.001  | 127.55% |
| K21                                   | 1/h           | 0.135  | 160.21% |
| Cmax                                  | µg/mL/mg Dose | 0.454  |         |
| t1/2                                  | h             | 8.274  |         |
| R <sup>2</sup>                        |               | 0.8422 |         |
| Akaike Information<br>Criterion (AIC) |               | -20.55 |         |

| Parameter                             | Unit          | Value  | %CV     |
|---------------------------------------|---------------|--------|---------|
| AUC 0-24 (Obs)                        | ng*h/mL       | 2257.3 |         |
| AUC 0-24 (Calc)                       | ng*h/mL       | 2554.3 |         |
| AUC 0-inf (Obs)                       | ng*h/mL       | 3344   |         |
| AUC 0-inf (Calc)                      | ng*h/mL       | 2677.3 |         |
| CL                                    | L/h           | 2.877  | 38.91%  |
| Vc                                    | L             | 1.955  | 70.63%  |
| CL2                                   | L/h           | 1.536  | 110.38% |
| V2                                    | L             | 7.988  | 92.57%  |
| CL/Kg                                 | L/h/Kg        | 9.590  | 38.91%  |
| Vc/Kg                                 | L/Kg          | 6.517  | 70.63%  |
| CL2/Kg                                | L/h/kg        | 5.119  | 110.38% |
| V2/Kg                                 | L/kg          | 26.63  | 92.57%  |
| K10                                   | 1/h           | 1.472  | 80.64%  |
| K12                                   | 1/h           | 0.786  | 131.04% |
| K21                                   | 1/h           | 0.192  | 144.06% |
| Cmax                                  | μg/mL/mg Dose | 0.391  |         |
| t1/2                                  | h             | 5.703  |         |
| R^2                                   |               | 0.7916 |         |
| Akaike Information<br>Criterion (AIC) |               | -21.48 |         |
